# Supplementary material for: Identification of the BolA Protein Reveals a Novel Virulence Factor in K. pneumoniae That Contributes to Survival in Host
Source: PubMed Central journal article supplement (PMC9603091; doi:10.1128/spectrum.00378-22), 2022-09-19
Supplement: spectrum.00378-22-s0001.pdf [file spectrum.00378-22-s0001.pdf]

**Table S1.** Bacterial strains and plasmids used in the current study

| Bacterial strains <sup>a</sup>     | Reference or source | Plasmids type <sup>b</sup>    | Reference or source |
|------------------------------------|---------------------|-------------------------------|---------------------|
| <i>E. coli</i> DH5 $\alpha$        | TransGen Biotech    | pKO3-Km                       | (1)                 |
| <i>K. pneumoniae</i> NTUH-K2044    | Laboratory stock    | pGEM-T easy-km                | (1)                 |
| $\Delta$ <i>bolA</i>               | this study          | pKO3-Km- $\Delta$ <i>bolA</i> | this study          |
| $\Delta$ <i>bolA</i> + <i>bolA</i> | this study          | pGEM-T easy-km- <i>bolA</i>   | this study          |

<sup>a</sup> *E. coli* DH5 $\alpha$ : cloning host; *K. pneumoniae* NTUH-K2044: hypervirulent *K. pneumoniae* with K1 serotype;  $\Delta$ *bolA*: NTUH-K2044 with the deletion of *bolA* gene;  $\Delta$ *bolA*+*bolA*:  $\Delta$ *bolA* complementation with *bolA* gene.

<sup>b</sup> pKO3-Km: Km<sup>r</sup>, suicide vector; pGEM-T easy-km: Km<sup>r</sup>, cloning vector; pKO3-Km- $\Delta$ *bolA*: Km<sup>r</sup>, suicide vector for the deletion of *bolA*; pGEM-T easy-km-*bolA*: Km<sup>r</sup>, cloning vector containing *bolA*.

## References

1. Xu L, Lin DS, Yang J, Li J, Li B. 2016. [Effect of *Klebsiella pneumoniae* KbvR regulator on bacterial biofilm formation and capsular synthesis]. *Nan Fang Yi Ke Da Xue Xue Bao* 36:1435-1439.

**Table S2.** Oligonucleotide primers used in this study

| Primers   | Sequence (5'-3')                            |
|-----------|---------------------------------------------|
| BolA-A    | GTATGCGGCCGCGATGTTATAGCGCACGTTACCC          |
| BolA-B    | TTCTAAGCGATACTCCCTGCGAACGCTGCTCTAAGTTTTGCTT |
| BolA-C    | AAGCAAAACTTAGAGCAGCGTTCGCAGGGAGTATCGCTTAGAA |
| BolA-D    | GTATGCGGCCGCGTATTCGCCCGGAACGTAGTT           |
| BolA-NF   | GTTATCCGTCACAACGTCCCT                       |
| BolA-NR   | ATACCGTATCCTGTAATGCTTCC                     |
| pKO3-F    | GTTGAATATGGCTCATAACACCC                     |
| pKO3-R    | TTGCTACGCCTGAATAAGTGA                       |
| BolA-HB-F | GTGTCGACAATCACAGTGCTCGGTCAACTC              |
| BolA-HB-R | GAGTCCATGGTCTCAACGCATGGTGTGTTAT             |

**Table S3.** The primers used for quantitative reverse-transcription PCR

| Primers | Sequence (5'- 3')      | Gene        | Product size (bp) |
|---------|------------------------|-------------|-------------------|
| pulH-F  | TGGTGCTGCTGGCGTTTCC    | <i>pulH</i> | 101               |
| pulH-R  | GGGTGGATGATAATGCCGAAGA |             |                   |
| pulK-F  | GTCTTCGTTCCGGCTGCTGG   | <i>pulK</i> | 184               |
| pulK-R  | TAGACCTCGTCCTCCGCTCC   |             |                   |
| pulE-F  | CCGCACGGCATCATCCTT     | <i>pulE</i> | 102               |
| pulE-R  | CGACTTTGGCGTTGACCTGA   |             |                   |
| vgrG-F  | ATGAGTAGCGTGAAATCGTTG  | <i>vgrG</i> | 136               |
| vgrG-R  | CAATACGGTAGCGGAACG     |             |                   |
| clpV-F  | CCTGAAGTCCCCTATGCC     | <i>clpV</i> | 125               |
| clpV-R  | CGAGTAAATCCACTGCCTTGTC |             |                   |
| afuA-F  | GGTGGATTATGTCTCCTACGGC | <i>afuA</i> | 122               |
| afuA-R  | CGGGATGCTGGCTGGTTT     |             |                   |
| afuB-F  | CTGCTGGCGGCGATGCTGAT   | <i>afuB</i> | 167               |
| afuB-R  | ATGCCCTGACCGACGGAACCCT |             |                   |
| fbpB-F  | ATCTGTTTGTCCGGCATCGC   | <i>fbpB</i> | 158               |
| fbpB-R  | ACAGGAATACCCACAGGAAGG  |             |                   |
| fhuB-F  | CGGCGTCATTCTGTTCGG     | <i>fhuB</i> | 124               |
| fhuB-R  | CAGCAGGATGGCGACTTTG    |             |                   |
| FeCD-F  | CGCAACTTTGAGCAGCGGATTA | <i>FeCD</i> | 119               |
| FeCD-R  | ATGCGGCTCGCCAAGCGGGTTA |             |                   |
| relA-F  | CGTGACTGGCTGAACCCT     | <i>relA</i> | 132               |

---

|            |                     |                 |     |
|------------|---------------------|-----------------|-----|
| relA-R     | CTGATGCCCAAATGCTCC  |                 |     |
| spoT-F     | TTCCAGGTGACCCGATTAT | <i>spoT</i>     | 125 |
| spoT-R     | CCCACTCAACCGCCATAA  |                 |     |
| entE-F     | TCGGTTCCTTCACCTACAC | <i>entE</i>     | 114 |
| entE-R     | TGCTTGCCCAGTCGTTCA  |                 |     |
| 16S rRNA-F | CGGTGAATACGTTTCYCGG | <i>16S rRNA</i> | 128 |
| 16S rRNA-R | GGWTACCTTGTTACGACTT |                 |     |

---

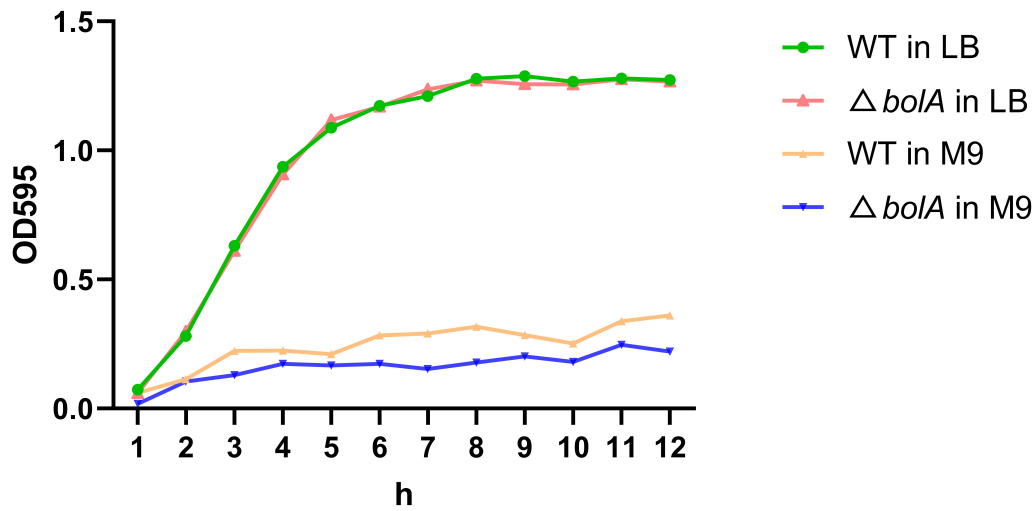

Fig S1. The growth kinetics of WT and  $\Delta bolA$  strains in LB and M9 medium, and bacterial growth was monitored by measuring the optical density of the culture at 595 nm. Dots correspond to the mean values of three biological replicates for each strain. Each parent/mutant pair was compared by *t*-test with an assumption for unequal variance. During a 12-h period, It was found that the deletion of *bolA* gene did not affect the growth rate of *K. pneumoniae* in LB medium, and the growth rate of *bolA* mutant strain was reduced compared with the WT strain in the M9 medium. However, there was no significant difference in growth rate between these two strains ( $p > 0.05$ ).
